# Supplementary material for: Pilot Scale Evaluation of Wild Saccharomyces cerevisiae Strains in Aglianico
Source: MDPI journal article supplement (doi:10.3390/fermentation9030245), 2023-03-03
Supplement: s1 [file s1]

## *Supplementary Material*

**Table S1.** Amounts of esters, alcohols, terpenes (equivalent  $\mu\text{g/L}$ ) and their odour and threshold values. The numbers in the column “code” are those used as symbol of the molecules in the PCA (Figures 3 and 4). In a row, values with different letters are significantly different (one-way ANOVA and LSD test,  $P < 0.05$ ).

| Volatile aromatic compounds | Code | Odour                   | Aroma Threshold (mg/L) | Sc7          | Sc22       | Sc34      | Sc41       | Sc48       | Sc65       | Sc70       |
|-----------------------------|------|-------------------------|------------------------|--------------|------------|-----------|------------|------------|------------|------------|
| ESTERS                      |      |                         |                        |              |            |           |            |            |            |            |
| Ethyl propanoate            | 1    | Pineapple               | 2.1                    | 109.35 B,C   | 85.86 B    | 130.89 C  | 0.00 A     | 0.00 A     | 79.89 B    | 123.63 C   |
| Ethyl isobutyrate           | 2    | sweet, fruity, ethereal | 0.6                    | 50.87 B      | 164.04 E   | 87.04 C   | 0.00 A     | 0.00 A     | 40.97 B    | 120.28 D   |
| Ethyl butanoate             | 3    | Floral, fruity          | 0.6                    | 0.09 A       | 1.00 A,B   | 0.05 A    | 10.53 D    | 0.00 A     | 3.32 B,C   | 4.62 C     |
| Propyl acetate              | 4    | Pears                   | 0.2                    | 42.79C, D    | 38.34A,B,C | 28.52 A,B | 25.81 A    | 42.38B,C,D | 52.82 D    | 30.11A,B,C |
| Isobutyl acetate            | 6    | Banana, fruity          | 1.9                    | 90.30 B      | 64.89 A    | 98.31 B   | 125.88 C   | 61.25 A    | 124.37 C   | 90.87 B    |
| Ethyl butyrate              | 7    | Floral, fruity          | 0.02                   | 82.85A ,B,C  | 69.91 A,B  | 68.16 A   | 97.95 C    | 59.01 A    | 100.71 C   | 94.31 B,C  |
| Ethyl 2-methylbutyrate      | 8    | Fruity, apple peal      | 5.6                    | 1.06 B,C     | 0.07 A     | 0.62 B    | 1.40 C     | 0.70 B     | 1.92 D     | 2.16 D     |
| Ethyl isovalerate           | 9    | Fruity-buttery          | 3.9                    | 0.66 B       | 0.60 A,B   | 0.43 A,B  | 1.04 C,D   | 0.25 A     | 0.73 B,C   | 1.22 D     |
| Butyl acetate               | 10   | Fruity                  | 1.8                    | 1.19A, B,C,D | 0.96 A,B,C | 1.49 C,D  | 1.74 D     | 0.62 A     | 1.28 B,C,D | 0.89 A,B   |
| Isoamyl acetate             | 11   | Banana, pear            | 0.03 <sup>a</sup>      | 437.33 A,B   | 358.98 A   | 497.94 B  | 609.96 C   | 355.97 A   | 458.12 A,B | 334.18 A   |
| Ethyl valerate              | 12   | Pleasant odour          | -                      | 0.92 A,B     | 0.69 A     | 0.63 A    | 1.15 B     | 0.53 A     | 1.13 B     | 0.93 A,B   |
| Methyl hexanoate            | 13   | Pineapple               | 0-3                    | 1.39 A       | 1.09 A     | 1.50 A,B  | 2.06 C     | 1.38 A     | 1.99 B,C   | 1.07 A     |
| Ethyl hexanoate             | 14   | Fruity                  | 0.05 <sup>a</sup>      | 126.39 A,B   | 69.88 A    | 308.79 E  | 188.47 C,D | 91.22 A,B  | 140.69 B,C | 247.15 D,E |
| Isoamyl butyrate            | 15   | Fruity (pear-like)      | 0.02 <sup>a</sup>      | 3.44 B,C     | 2.08 A,B   | 1.48 A    | 4.26 C,D   | 1.08 A     | 1.93 A,B   | 5.01 D     |

|                          |    |                      |                   |            |           |          |          |          |            |          |
|--------------------------|----|----------------------|-------------------|------------|-----------|----------|----------|----------|------------|----------|
| Hexyl acetate            | 16 | Mild sweet odour     | 0.7               | 6.40 A     | 5.33 A    | 8.17 B   | 9.63 C   | 5.44 A   | 8.86 B,C   | 9.20 B,C |
| Ethyl heptanoate         | 17 | Grape like           | 0.6               | 0.72 B     | 0.44 A    | 0.26 A   | 1.01 C,D | 0.98 C,D | 1.12 D     | 0.83 B,C |
| Ethyl trans-2-hexenoate  | 18 | Fruity               | 0.4               | 1.24 C     | 0.83 A,B  | 1.03 B,C | 1.69 D   | 0.58 A   | 1.19 C     | 0.74 A,B |
| Ethyl octanoate          | 21 | Fruity -             | 0.02 <sup>a</sup> | 150.02 A,B | 98.30 A   | 521.30 D | 211.86 B | 251.46 C | 162.88 A,B | 215.60 B |
| Isoamyl hexanoate        | 22 | Fruity               | -                 | 2.66 B,C   | 2.39 B    | 1.69 A,B | 3.48 C   | 1.93 A,B | 1.00 A     | 2.42 B   |
| Ethyl decanoate          | 26 | Floral, soap         | 0.2               | 0.57 B     | 0.03 A    | 1.04 C   | 0.13 A   | 0.17 A   | 1.18 C     | 0.79 B   |
| Isoamyl octanoate        | 27 | Banana, pear         | -                 | 1.62 A,B   | 1.67 A,B  | 2.00 B   | 2.12 B   | 1.09 A   | 1.99 B     | 2.12 B   |
| Ethyl phenylacetate      | 29 | Floral, fruity, rose | 0.25              | 3.97 B     | 4.27 B    | 5.92 C   | 5.84 C   | 2.25 A   | 4.22 B     | 7.81 D   |
| 3-Phenylethyl acetate    | 30 | Floral, fruity, rose | 0.25              | 15.18 A    | 50.91 B,C | 91.31 D  | 24.87 A  | 64.09 C  | 88.76 D    | 43.25 B  |
| Ethyl 2-hydroxyhexanoate | 36 | Fruity               | 1.8               | 1.15 B     | 0.00 A    | 0.01 A   | 1.57 B   | 0.00 A   | 1.42 B     | 1.80 B   |
| Ethyl 3-hydroxyhexanoate | 37 | Fruity               | 1.1               | 1.32 B     | 0.00 A    | 0.01 A   | 1.84 B   | 0.40 A   | 1.60 B     | 0.77 B   |
| Methyl 4-hydroxybutyrate | 38 | Fruity               | 1.2               | 2.27 B,C   | 0.00 A    | 1.52 B   | 3.06 C   | 2.19 B   | 3.31 C     | 3.34 C   |
| Ethyl 4-hydroxybutyrate  | 39 | Fruity               | 1.2               | 1.15 B     | 0.00 A    | 0.68 A,B | 1.80 B   | 0.00 A   | 0.00 A     | 1.25 B   |
| Ethyl 6-hydroxyhexanoate | 40 | Fruity               | 1.8               | 1.98 C     | 0.86 B    | 1.96 C   | 2.95 C   | 0.19 A   | 0.53 A,B   | 2.10 C   |

## ALCOHOLS

|            |    |                     |                  |          |          |            |          |          |          |          |
|------------|----|---------------------|------------------|----------|----------|------------|----------|----------|----------|----------|
| 1-propanol | 43 | Pungent, astringent | 500              | 229.87 A | 180.02 A | 197.83 A   | 341.22 B | 341.45 B | 167.00 A | 217.61 A |
| 1-Butanol  | 44 | Alcoholic           | 150 <sup>a</sup> | 312.47 C | 208.22 B | 276.08 B,C | 423.42 D | 120.20 A | 108.46 A | 304.25 C |

|                      |    |                    |                  |               |                 |            |          |            |            |                 |
|----------------------|----|--------------------|------------------|---------------|-----------------|------------|----------|------------|------------|-----------------|
| 3-Methyl-2-butanol   | 45 | Alcoholic          | 30 <sup>a</sup>  | 586.56<br>C,D | 478.88 B,C      | 353.99 A,B | 702.76 D | 526.19 C   | 294.37 A   | 502.02 C        |
| 1-Pentanol           | 46 | alcoholic          | 80               | 1.20 C        | 1.51 D          | 0.90 B     | 1.69 D,E | 0.89 B     | 0.24 A     | 1.97 E          |
| 4-Methyl-1-pentanol  | 47 | alcoholic          | 50               | 0.80<br>A,B   | 0.64 A          | 1.02 B,C   | 1.15 C   | 1.13 C     | 0.71 A     | 1.42 D          |
| 2-Heptanol           | 48 | alcoholic          | 0.07             | 0.78 C        | 0.46 A,B        | 0.89 C     | 1.11 D   | 0.51 B     | 0.29 A     | 1.21 D          |
| 1-Hexanol            | 49 | Herbaceous         | 4                | 128.35<br>C   | 63.69 A         | 108.03 B,C | 174.85 D | 51.50 A    | 96.30 B,C  | 79.33 A,B       |
| cis-3-Hexen-1-ol     | 50 | Herbaceous         | 0.4              | 122.01<br>B,C | 72.18 A         | 95.05 A,B  | 145.87 C | 87.91 A    | 133.10 C   | 85.59 A         |
| 1-Octen-3-ol         | 53 | pungent            | 0.020            | 0.26 A        | 0.22 A          | 0.30 A     | 0.57 A   | 0.10 A     | 0.17 A     | 0.23 A          |
| 1-Heptanol           | 54 | alcoholic          | 1.0              | 0.25 A        | 0.14 A          | 0.28 A     | 0.38 A   | 0.30 A     | 0.20 A     | 0.14 A          |
| Benzyl alcohol       | 56 | Floral rose        | -                | 108.08<br>A,B | 90.99 A,B       | 132.09 B   | 133.77 B | 71.34 A    | 117.81 A,B | 91.43 A,B       |
| 2-Phenylethanol      | 57 | Rose               | 0.75             | 334.47<br>C,D | 291.64<br>A,B,C | 394.97 D,E | 447.81   | 211.42 A,B | 204.49 A   | 306.29B,C,<br>D |
| TERPENES             |    |                    |                  |               |                 |            |          |            |            |                 |
| Linalool             | 59 | Rose               | 0.025            | 8.26 B        | 8.20 B          | 9.26 B,C   | 11.24 C  | 5.55 A     | 14.56 D    | 9.88 B,C        |
| $\alpha$ -Terpineol  | 60 | Lilac type<br>note | 0.4              | 7.92 A        | 9.06 A,B        | 9.85 B     | 11.82 C  | 11.79 C    | 8.42 A,B   | 12.26 C         |
| $\beta$ -Citronellol | 61 | Citronella         | 100 <sup>a</sup> | 4.51 B        | 5.93 C          | 7.85 D     | 6.30 C   | 4.56 B     | 3.07 A     | 6.15 C          |
| Geraniol             | 62 | Rose               | 0.4              | 3.59<br>A,B   | 4.21 B          | 5.72 C     | 5.84 C   | 4.03 B     | 2.64 A     | 7.21 D          |
| $\beta$ -damascenone | 63 | Rose like<br>scent | 0.004            | 12.33 B       | 0.93 A          | 13.31 B    | 17.26 C  | 0.74 A     | 0.00 A     | 11.08 B         |
